# Supplementary material for: Pinot blanc and Pinot gris arose as independent somatic mutations of Pinot noir
Source: PubMed Central journal article supplement — J Exp Bot. 2012 Oct 23;63(18):6359–69. doi: 10.1093/jxb/ers290 (PMC3504490; doi:10.1093/jxb/ers290), 2012-10-23
Supplement: supp_ers290_jexbot084368_file001.pdf [file supp_ers290_jexbot084368_file001.pdf]

**Pinot blanc and Pinot gris arose as independent somatic mutations of Pinot noir**

Silvia Vezzulli, Lorena Leonardelli, Umberto Malossini, Marco Stefanini, Riccardo Velasco, Claudio Moser

| Cultivar          | Clone    | Sample set          | State       | Berry description            | Tissue                        | Tissue code | Location                      | Origin |
|-------------------|----------|---------------------|-------------|------------------------------|-------------------------------|-------------|-------------------------------|--------|
| <b>Pinot noir</b> | ENTAV115 | core                | WT          |                              | Leaf                          | L           | IASMA, San Michele a/A (TN)   | France |
|                   |          | core                | WT          | black-skinned berries        | Berry skin                    | S           | IASMA, San Michele a/A (TN)   | France |
|                   |          | core                | WT          | black-skinned berries        | Berry flesh                   | F           | IASMA, San Michele a/A (TN)   | France |
|                   |          | core                | WT          |                              | Root                          | R           | IASMA, San Michele a/A (TN)   | France |
| Pinot noir        | SMA185   | core                | WT          |                              | Leaf                          | L           | IASMA, San Michele a/A (TN)   | Italy  |
|                   |          | core                | WT          | black-skinned berries        | Berry skin                    | S           | IASMA, San Michele a/A (TN)   | Italy  |
|                   |          | core                | WT          | black-skinned berries        | Berry flesh                   | F           | IASMA, San Michele a/A (TN)   | Italy  |
|                   |          | core                | WT          |                              | Root                          | R           | IASMA, San Michele a/A (TN)   | Italy  |
| Pinot noir        | SMA191   | core                | WT          |                              | Leaf                          | L           | IASMA, San Michele a/A (TN)   | Italy  |
|                   |          | core                | WT          | black-skinned berries        | Berry skin                    | S           | IASMA, San Michele a/A (TN)   | Italy  |
|                   |          | core                | WT          | black-skinned berries        | Berry flesh                   | F           | IASMA, San Michele a/A (TN)   | Italy  |
|                   |          | core                | WT          |                              | Root                          | R           | IASMA, San Michele a/A (TN)   | Italy  |
| Pinot noir        | SMA201   | core                | WT          |                              | Leaf                          | L           | IASMA, San Michele a/A (TN)   | Italy  |
|                   |          | core                | WT          | black-skinned berries        | Berry skin                    | S           | IASMA, San Michele a/A (TN)   | Italy  |
|                   |          | core                | WT          | black-skinned berries        | Berry flesh                   | F           | IASMA, San Michele a/A (TN)   | Italy  |
|                   |          | core                | WT          |                              | Root                          | R           | IASMA, San Michele a/A (TN)   | Italy  |
| <b>Pinot gris</b> | SMA505   | core                | WT          |                              | Leaf                          | L           | IASMA, Roverè della Luna (TN) | Italy  |
|                   |          | core                | WT          | grey-skinned berries         | Berry skin                    | S           | IASMA, Roverè della Luna (TN) | Italy  |
|                   |          | core                | WT          | grey-skinned berries         | Berry flesh                   | F           | IASMA, Roverè della Luna (TN) | Italy  |
|                   |          | core                | WT          |                              | Root                          | R           | IASMA, Roverè della Luna (TN) | Italy  |
|                   |          | extended            | MUT         |                              | Leaf                          | L           | IASMA, Roverè della Luna (TN) | Italy  |
|                   |          | extended            | MUT         | wholly mutated buds          | Berry skin                    | S           | IASMA, Roverè della Luna (TN) | Italy  |
| extended          | MUT      | wholly mutated buds | Berry flesh | F                            | IASMA, Roverè della Luna (TN) | Italy       |                               |        |
| Pinot gris        | SMA514   | core                | WT          |                              | Leaf                          | L           | IASMA, Roverè della Luna (TN) | Italy  |
|                   |          | core                | WT          | grey-skinned berries         | Berry skin                    | S           | IASMA, Roverè della Luna (TN) | Italy  |
|                   |          | core                | WT          | grey-skinned berries         | Berry flesh                   | F           | IASMA, Roverè della Luna (TN) | Italy  |
|                   |          | core                | WT          |                              | Root                          | R           | IASMA, Roverè della Luna (TN) | Italy  |
|                   |          | extended            | MUT         | wholly white-skinned berries | Berry skin                    | S           | IASMA, Roverè della Luna (TN) | Italy  |
|                   |          | extended            | MUT         | wholly white-skinned berries | Berry flesh                   | F           | IASMA, Roverè della Luna (TN) | Italy  |

|            |          |          |        |                                  |             |   |                               |         |
|------------|----------|----------|--------|----------------------------------|-------------|---|-------------------------------|---------|
| Pinot gris | 49/207FR | extended | WT     |                                  | Leaf        | L | CRA-VIT, Conegliano V (TV)    | Germany |
|            |          | extended | WT     | grey-skinned berries             | Berry skin  | S | CRA-VIT, Conegliano V (TV)    | Germany |
|            |          | extended | WT     | grey-skinned berries             | Berry flesh | F | CRA-VIT, Conegliano V (TV)    | Germany |
| Pinot gris | CL52     | extended | WT     |                                  | Leaf        | L | CRA-VIT, Conegliano V (TV)    | France  |
|            |          | extended | WT     | grey-skinned berries             | Berry skin  | S | CRA-VIT, Conegliano V (TV)    | France  |
|            |          | extended | WT     | grey-skinned berries             | Berry flesh | F | CRA-VIT, Conegliano V (TV)    | France  |
| Pinot gris | CL53     | extended | WT     |                                  | Leaf        | L | CRA-VIT, Conegliano V (TV)    | France  |
|            |          | extended | WT     | grey-skinned berries             | Berry skin  | S | CRA-VIT, Conegliano V (TV)    | France  |
|            |          | extended | WT     | grey-skinned berries             | Berry flesh | F | CRA-VIT, Conegliano V (TV)    | France  |
| Pinot gris | 457      | extended | WT     |                                  | Leaf        | L | CRA-VIT, Conegliano V (TV)    | France  |
|            |          | extended | WT     | grey-skinned berries             | Berry skin  | S | CRA-VIT, Conegliano V (TV)    | France  |
|            |          | extended | WT     | grey-skinned berries             | Berry flesh | F | CRA-VIT, Conegliano V (TV)    | France  |
| Pinot gris | FEDIT13  | extended | WT     |                                  | Leaf        | L | CRA-VIT, Conegliano V (TV)    | Italy   |
|            |          | extended | WT     | grey-skinned berries             | Berry skin  | S | CRA-VIT, Conegliano V (TV)    | Italy   |
|            |          | extended | WT     | grey-skinned berries             | Berry flesh | F | CRA-VIT, Conegliano V (TV)    | Italy   |
| Pinot gris | R6       | extended | WT     |                                  | Leaf        | L | CRA-VIT, Conegliano V (TV)    | Italy   |
|            |          | extended | WT     | grey-skinned berries             | Berry skin  | S | CRA-VIT, Conegliano V (TV)    | Italy   |
|            |          | extended | WT     | grey-skinned berries             | Berry flesh | F | CRA-VIT, Conegliano V (TV)    | Italy   |
| Pinot gris | VCR5     | extended | WT     |                                  | Leaf        | L | CRA-VIT, Conegliano V (TV)    | Italy   |
|            |          | extended | WT     | grey-skinned berries             | Berry skin  | S | CRA-VIT, Conegliano V (TV)    | Italy   |
|            |          | extended | WT     | grey-skinned berries             | Berry flesh | F | CRA-VIT, Conegliano V (TV)    | Italy   |
| Pinot gris | 10-5     | extended | WT     |                                  | Leaf        | L | IASMA, San Michele a/A (TN)   | Hungary |
|            |          | extended | WT     | grey-skinned berries             | Berry skin  | S | IASMA, San Michele a/A (TN)   | Hungary |
|            |          | extended | WT     | grey-skinned berries             | Berry flesh | F | IASMA, San Michele a/A (TN)   | Hungary |
|            |          | extended | MUT    | wholly white-skinned berries     | Berry skin  | S | IASMA, San Michele a/A (TN)   | Hungary |
|            |          | extended | MUT    | wholly white-skinned berries     | Berry flesh | F | IASMA, San Michele a/A (TN)   | Hungary |
| Pinot gris | 10-10    | extended | WT     |                                  | Leaf        | L | IASMA, San Michele a/A (TN)   | Hungary |
|            |          | extended | WT     | grey-skinned berries             | Berry skin  | S | IASMA, San Michele a/A (TN)   | Hungary |
|            |          | extended | WT     | grey-skinned berries             | Berry flesh | F | IASMA, San Michele a/A (TN)   | Hungary |
| Pinot gris | 513      | extended | WT     | grey-skinned berries             | Berry skin  | S | IASMA, Roverè della Luna (TN) | Italy   |
|            |          | extended | WT     | grey-skinned berries             | Berry flesh | F | IASMA, Roverè della Luna (TN) | Italy   |
|            |          | extended | MUT_wt | grey sector of sectorial chimera | Berry skin  | S | IASMA, Roverè della Luna (TN) | Italy   |

|                    |      |          |         |                                     |             |   |                               |         |
|--------------------|------|----------|---------|-------------------------------------|-------------|---|-------------------------------|---------|
|                    |      | extended | MUT_mut | white sector of sectorial chimera   | Berry skin  | S | IASMA, Roverè della Luna (TN) | Italy   |
|                    |      | extended | MUT     | sectorial chimera                   | Berry flesh | F | IASMA, Roverè della Luna (TN) | Italy   |
|                    |      | extended | MUT     |                                     | Leaf        | L | IASMA, Roverè della Luna (TN) | Italy   |
|                    |      | extended | MUT     | wholly white-skinned berry clusters | Berry skin  | S | IASMA, Roverè della Luna (TN) | Italy   |
|                    |      | extended | MUT     | wholly white-skinned berry clusters | Berry flesh | F | IASMA, Roverè della Luna (TN) | Italy   |
| Pinot gris         | 516  | extended | WT      |                                     | Leaf        | L | IASMA, Roverè della Luna (TN) | Italy   |
|                    |      | extended | WT      | grey-skinned berries                | Berry skin  | S | IASMA, Roverè della Luna (TN) | Italy   |
|                    |      | extended | WT      | grey-skinned berries                | Berry flesh | F | IASMA, Roverè della Luna (TN) | Italy   |
|                    |      | extended | MUT_wt  | grey sector of sectorial chimera    | Berry skin  | S | IASMA, Roverè della Luna (TN) | Italy   |
|                    |      | extended | MUT_mut | white sector of sectorial chimera   | Berry skin  | S | IASMA, Roverè della Luna (TN) | Italy   |
|                    |      | extended | MUT     | sectorial chimera                   | Berry flesh | F | IASMA, Roverè della Luna (TN) | Italy   |
|                    |      | extended | MUT     | wholly white-skinned berries        | Berry skin  | S | IASMA, Roverè della Luna (TN) | Italy   |
|                    |      | extended | MUT     | wholly white-skinned berries        | Berry flesh | F | IASMA, Roverè della Luna (TN) | Italy   |
|                    |      | extended | MUT     |                                     | Leaf        | L | IASMA, Roverè della Luna (TN) | Italy   |
|                    |      | extended | MUT     | wholly mutated buds                 | Berry skin  | S | IASMA, Roverè della Luna (TN) | Italy   |
|                    |      | extended | MUT     | wholly mutated buds                 | Berry flesh | F | IASMA, Roverè della Luna (TN) | Italy   |
| <b>Pinot blanc</b> | Lb16 | core     | WT      |                                     | Leaf        | L | Laimburg, Vadena (BZ)         | Italy   |
|                    |      | core     | WT      | white-skinned berries               | Berry skin  | S | Laimburg, Vadena (BZ)         | Italy   |
|                    |      | core     | WT      | white-skinned berries               | Berry flesh | F | Laimburg, Vadena (BZ)         | Italy   |
|                    |      | core     | WT      |                                     | Root        | R | Laimburg, Vadena (BZ)         | Italy   |
| Pinot blanc        | Lb18 | core     | WT      |                                     | Leaf        | L | Laimburg, Vadena (BZ)         | Italy   |
|                    |      | core     | WT      | white-skinned berries               | Berry skin  | S | Laimburg, Vadena (BZ)         | Italy   |
|                    |      | core     | WT      | white-skinned berries               | Berry flesh | F | Laimburg, Vadena (BZ)         | Italy   |
|                    |      | core     | WT      |                                     | Root        | R | Laimburg, Vadena (BZ)         | Italy   |
| Pinot blanc        | 72FR | extended | WT      |                                     | Leaf        | L | CRA-VIT, Conegliano V (TV)    | Germany |
|                    |      | extended | WT      | white-skinned berries               | Berry skin  | S | CRA-VIT, Conegliano V (TV)    | Germany |
|                    |      | extended | WT      | white-skinned berries               | Berry flesh | F | CRA-VIT, Conegliano V (TV)    | Germany |
| Pinot blanc        | CL55 | extended | WT      |                                     | Leaf        | L | CRA-VIT, Conegliano V (TV)    | France  |
|                    |      | extended | WT      | white-skinned berries               | Berry skin  | S | CRA-VIT, Conegliano V (TV)    | France  |
|                    |      | extended | WT      | white-skinned berries               | Berry flesh | F | CRA-VIT, Conegliano V (TV)    | France  |
| Pinot blanc        | CL54 | extended | WT      |                                     | Leaf        | L | CRA-VIT, Conegliano V (TV)    | France  |

|                      |        |          |    |                       |             |   |                             |         |
|----------------------|--------|----------|----|-----------------------|-------------|---|-----------------------------|---------|
|                      |        | extended | WT | white-skinned berries | Berry skin  | S | CRA-VIT, Conegliano V (TV)  | France  |
|                      |        | extended | WT | white-skinned berries | Berry flesh | F | CRA-VIT, Conegliano V (TV)  | France  |
| Pinot blanc          | 33W    | extended | WT |                       | Leaf        | L | CRA-VIT, Conegliano V (TV)  | Germany |
|                      |        | extended | WT | white-skinned berries | Berry skin  | S | CRA-VIT, Conegliano V (TV)  | Germany |
|                      |        | extended | WT | white-skinned berries | Berry flesh | F | CRA-VIT, Conegliano V (TV)  | Germany |
| Pinot blanc          | 209D   | extended | WT |                       | Leaf        | L | CRA-VIT, Conegliano V (TV)  | Germany |
|                      |        | extended | WT | white-skinned berries | Berry skin  | S | CRA-VIT, Conegliano V (TV)  | Germany |
|                      |        | extended | WT | white-skinned berries | Berry flesh | F | CRA-VIT, Conegliano V (TV)  | Germany |
| Pinot blanc          | 212D   | extended | WT |                       | Leaf        | L | CRA-VIT, Conegliano V (TV)  | Germany |
|                      |        | extended | WT | white-skinned berries | Berry skin  | S | CRA-VIT, Conegliano V (TV)  | Germany |
|                      |        | extended | WT | white-skinned berries | Berry flesh | F | CRA-VIT, Conegliano V (TV)  | Germany |
| Pinot blanc          | VCR5   | extended | WT |                       | Leaf        | L | CRA-VIT, Conegliano V (TV)  | Italy   |
|                      |        | extended | WT | white-skinned berries | Berry skin  | S | CRA-VIT, Conegliano V (TV)  | Italy   |
|                      |        | extended | WT | white-skinned berries | Berry flesh | F | CRA-VIT, Conegliano V (TV)  | Italy   |
| Pinot blanc          | VCR7   | extended | WT |                       | Leaf        | L | CRA-VIT, Conegliano V (TV)  | Italy   |
|                      |        | extended | WT | white-skinned berries | Berry skin  | S | CRA-VIT, Conegliano V (TV)  | Italy   |
|                      |        | extended | WT | white-skinned berries | Berry flesh | F | CRA-VIT, Conegliano V (TV)  | Italy   |
| <b>Pinot meunier</b> | SMA814 | core     | WT |                       | Leaf        | L | IASMA, San Michele a/A (TN) | Italy   |
|                      |        | core     | WT | black-skinned berries | Berry skin  | S | IASMA, San Michele a/A (TN) | Italy   |
|                      |        | core     | WT | black-skinned berries | Berry flesh | F | IASMA, San Michele a/A (TN) | Italy   |
|                      |        | core     | WT |                       | Root        | R | IASMA, San Michele a/A (TN) | Italy   |
| Pinot meunier        | SMA829 | core     | WT |                       | Leaf        | L | IASMA, San Michele a/A (TN) | Italy   |
|                      |        | core     | WT | black-skinned berries | Berry skin  | S | IASMA, San Michele a/A (TN) | Italy   |
|                      |        | core     | WT | black-skinned berries | Berry flesh | F | IASMA, San Michele a/A (TN) | Italy   |
|                      |        | core     | WT |                       | Root        | R | IASMA, San Michele a/A (TN) | Italy   |

**Table S1**

List of the studied Pinots.

| SSR locus    | Reference                                    | Ta (°C) | Taq-polymerase       | Use                       |
|--------------|----------------------------------------------|---------|----------------------|---------------------------|
| VVS2         | Thomas et al. 1994 (in This et al. 2004)     | 52      | TaqGold, Life Tech   | true-to-type confirmation |
| VVMD5        | Bowers et al. 1996 (in This et al. 2004)     | 50      | BioTaq, Bionline     | true-to-type confirmation |
| VVMD7        | Bowers et al. 1996 (in This et al. 2004)     | 52      | TaqGold, Life Tech   | true-to-type confirmation |
| VVMD27       | Bowers et al. 1996 (in This et al. 2004)     | 52      | TaqGold, Life Tech   | true-to-type confirmation |
| VrZAG62      | Sefc et al. 1999 (in This et al. 2004)       | 52      | HotStart Taq, Qiagen | true-to-type confirmation |
| VrZAG79      | Sefc et al. 1999 (in This et al. 2004)       | 52      | HotStart Taq, Qiagen | true-to-type confirmation |
| VVMD25       | Bowers et al. 1999                           | 54      | HotStart Taq, Qiagen | true-to-type confirmation |
| VVMD28       | Bowers et al. 1999                           | 54      | HotStart Taq, Qiagen | true-to-type confirmation |
| VVMD32       | Bowers et al. 1999                           | 54      | HotStart Taq, Qiagen | true-to-type confirmation |
| VMC5g6.1     | Agrogene, France (in Riaz et al. 2002)       | 55      | HotStart Taq, Qiagen | triallelism analysis      |
| VMC8f10      | Agrogene, France (in Riaz et al. 2002)       | 55      | HotStart Taq, Qiagen | triallelism analysis      |
| VMCNg1b9     | Agrogene, France (in Riaz et al. 2002)       | 55      | HotStart Taq, Qiagen | triallelism analysis      |
| VMC1e8       | Agrogene, France (in Riaz et al. 2002)       | 55      | HotStart Taq, Qiagen | triallelism analysis      |
| VMC3b12      | Agrogene, France (in Riaz et al. 2002)       | 55      | HotStart Taq, Qiagen | triallelism analysis      |
| VMC3c9       | Agrogene, France (in Riaz et al. 2002)       | 55      | HotStart Taq, Qiagen | triallelism analysis      |
| VMC6b11      | Arroyo-Garcia and Martinez-Zapater (at NCBI) | 55      | HotStart Taq, Qiagen | deletion delimitation     |
| SC8_0146_010 | Adam-Blondon A-F, personal communication     | 55      | HotStart Taq, Qiagen | deletion delimitation     |
| SC8_0146_026 | Adam-Blondon A-F, personal communication     | 55      | HotStart Taq, Qiagen | deletion delimitation     |
| VVNTM1       | Fournier-Level et al. 2009                   | 55      | HotStart Taq, Qiagen | deletion delimitation     |
| VVNTM2       | Fournier-Level et al. 2009                   | 55      | HotStart Taq, Qiagen | deletion delimitation     |
| VVNTM3       | Fournier-Level et al. 2009                   | 55      | HotStart Taq, Qiagen | deletion delimitation     |
| VVNTM4       | Fournier-Level et al. 2009                   | 55      | HotStart Taq, Qiagen | deletion delimitation     |
| VVNTM5       | Fournier-Level et al. 2009                   | 55      | HotStart Taq, Qiagen | deletion delimitation     |
| VVNTM6       | Fournier-Level et al. 2009                   | 55      | HotStart Taq, Qiagen | deletion delimitation     |
| VVIU20       | Merdinoglu et al. 2005                       | 55      | HotStart Taq, Qiagen | deletion delimitation     |
| VMC7g3       | Pellerone et al. 2001                        | 55      | HotStart Taq, Qiagen | deletion delimitation     |

**Table S2**

Primer information of the used microsatellite markers.

| <b>Locus</b>   | <b>Primer_F sequence information</b> | <b>Primer_R sequence information</b> | <b>Ta</b> |
|----------------|--------------------------------------|--------------------------------------|-----------|
| ProMybA1_Gret+ | TCCTCTCTAACCATGGCTAA                 | GAACCTTCTTTTTGAAGTGGTGACT            | 55        |
| ProMybA1_Gret- | GACGTAAAAAATGGTTGCACGTG              | GAACCTTCTTTTTGAAGTGGTGACT            | 58        |
| 3'UTRMybA1     | TTCCAGGGAGGACTGCTAATGATG             | TTGGCACCATAATTTTCCATTTTC             | 57        |
| ProMybA2       | GTGAGGAGAGTACATTGTAGGA               | GAACCTTCTTTTTTCAGGTGGTGACC           | 55        |
| 3'UTRMybA2     | TTCCAGGGAGGACTGCTAATGATG             | GGTGGTGCAATGACCTATAG                 | 56        |
| ProMybA3       | AACCCGGTCATTGAATTGACAATAG            | GAACCTTCTTTTTTCAGGTGGTGACC           | 63        |
| 3'UTRMybA3     | CCTTGATTGCGGGTAGGCTTC                | GGGCCCTCAAATGGAGAAGT                 | 63        |
| MybA4          | TGTCGCAAGGAACATGGTAA                 | CATTGCTTGAGTTTGGATGC                 | 56        |
| SNP0060        | TTGGCCATTTTGTCTCTTTC                 | CGATTGAATTGGGCAAGTTT                 | 57        |
| SNP4045        | TGCCATGTGTTTGCCATTAT                 | AGTCAACACCCACAACCACA                 | 57        |
| SNP4071        | AGCATCTTCCAAATGTCTTT                 | TTAATGACCCTAACCATCCA                 | 57        |
| SNP4165        | ATATGACCTGGCTGCCAAAG                 | CCTTCTGTCTTGACACTTGTGC               | 57        |
| SNP6003        | TTTTGGAATTAAGAATCCAATCA              | ATTTGGCCTTGAGTCGTGTC                 | 56        |
| SNP6097        | GGCCCATCAACAAAATCCTA                 | GCAGTGAAGAGCAACACCTG                 | 57        |
| SNP6139        | TGTGGAAGATGATGGCTTAAAA               | ACCCATTCCCAAAGAAAGG                  | 57        |
| SNP6166        | GAATTTGGCAATGTTATGGT                 | AACAGACAAATCATTGATGGA                | 57        |
| SNP7002        | AATGGACGATGCAATGTTGA                 | ACTCTGCAAGTGCTTTTTGC                 | 56        |
| SNP7054        | GGAAAAATGGAATGGAGGTA                 | GGTAGACAAGAGGTCCCAGA                 | 57        |
| SNP7234        | CAATTCTCATCCAAACCAAC                 | AAGTCTCCACAAAACATGAGA                | 57        |
| SNP7253        | CCTCAACCAGGAATTTGTCTT                | CCTCTTTGGAGGGAAAAATCA                | 56        |
| SNP8066        | GCCCTTTAGGGTCTTTGGAA                 | CACAACTGTTGATTGTCTTGGA               | 57        |
| SV02           | CCCAATTAATCCGTGAATGG                 | TACAAGCCCTGGTGTGTCAA                 | 58        |
| SV06           | CGCCTTGCTCTCTACTCC                   | AGGCACTTGGGTGATAATCG                 | 58        |
| SV08           | AGGAGGAGGAGGAAATGAGG                 | TGGCTATGTAAGTTAGTGCTTCTCA            | 58        |
| SV09           | AAGCCTTGGCAGTCTTTCTG                 | GGAAGGATGAAGAGGTGCAA                 | 58        |
| SV10           | TGGAGTACATGGGCAATCAA                 | AGCTGCTTCACCACCAACTT                 | 58        |
| SV12           | TAGTGGGTGGGACAGGCTAC                 | GGGAAGCCATGAAAGAAAAG                 | 58        |

**Table S3**

Primer information of the studied regions distributed along the chromosome 2.

| <i>a.</i>     |          |           |          |           |         |          |         |                                                                                                                                                                 |        |        |
|---------------|----------|-----------|----------|-----------|---------|----------|---------|-----------------------------------------------------------------------------------------------------------------------------------------------------------------|--------|--------|
| Cultivar      | Clones * | VVS2      | VVMD5    | VVMD7     | VVMD27  | VrZAG62  | VrZAG79 | VVMD25                                                                                                                                                          | VVMD28 | VVMD32 |
| Pinot noir    | all      |           |          |           |         |          |         |                                                                                                                                                                 |        |        |
|               |          | 137       | 228      | 239       | 182     | 187      | 239     | 241                                                                                                                                                             | 217    | 242    |
|               |          | 151       | 238      | 243       | 186     | 193      | 245     | 251                                                                                                                                                             | 235    | 274    |
| Pinot gris    | all      |           |          |           |         |          |         |                                                                                                                                                                 |        |        |
|               |          | 137       | 228      | 239       | 182     | 187      | 239     | 241                                                                                                                                                             | 217    | 242    |
|               |          | 151       | 238      | 243       | 186     | 193      | 245     | 251                                                                                                                                                             | 235    | 274    |
| Pinot blanc   | all      |           |          |           |         |          |         |                                                                                                                                                                 |        |        |
|               |          | 137       | 228      | 239       | 182     | 187      | 239     | 241                                                                                                                                                             | 217    | 242    |
|               |          | 151       | 238      | 243       | 186     | 193      | 245     | 251                                                                                                                                                             | 235    | 274    |
| Pinot meunier | all      | 130       |          |           |         |          |         |                                                                                                                                                                 |        |        |
|               |          | 137       | 228      | 239       | 182     | 187      | 239     | 241                                                                                                                                                             | 217    | 242    |
|               |          | 151       | 238      | 243       | 186     | 193      | 245     | 251                                                                                                                                                             | 235    | 274    |
| <i>b.</i>     |          |           |          |           |         |          |         |                                                                                                                                                                 |        |        |
| Cultivar      | Clones   | VMC 5g6.1 | VMC 8f10 | VMC NG1b9 | VMC 1e8 | VMC 3b12 | VMC 3c9 |                                                                                                                                                                 |        |        |
| Pinot noir    | all      |           |          |           |         |          |         |                                                                                                                                                                 |        |        |
|               |          | 114       | 197      | 157       | 227     | 109      | 260     | * the results refer to the L1+L2 genetic make-up that is always identical to the L2 profile, except for the Pinot meunier clones at VVS2 locus (L2: 130-137 bp) |        |        |
|               |          | 155       | 199      | 157       | 231     | 121      | 266     |                                                                                                                                                                 |        |        |
| Pinot gris    | all      |           |          |           |         |          |         |                                                                                                                                                                 |        |        |
|               |          | 114       | 197      | 157       | 227     | 109      | 260     |                                                                                                                                                                 |        |        |
|               |          | 155       | 199      | 157       | 231     | 121      | 266     |                                                                                                                                                                 |        |        |
| Pinot blanc   | all      |           |          |           |         |          |         |                                                                                                                                                                 |        |        |
|               |          | 114       | 197      | 157       | 227     | 109      | 260     |                                                                                                                                                                 |        |        |
|               |          | 155       | 199      | 157       | 231     | 121      | 266     |                                                                                                                                                                 |        |        |
| Pinot meunier | all      |           |          |           |         |          |         |                                                                                                                                                                 |        |        |
|               |          | 114       | 197      | 157       | 227     | 109      | 260     |                                                                                                                                                                 |        |        |
|               |          | 155       | 199      | 157       | 231     | 121      | 266     |                                                                                                                                                                 |        |        |

**Table S4**

Genetic profile of the Pinots core set at genome level.



| Cv | Clone    | Tissue code | Layer | SV10   |     | SV12   |     |   |     | SNP4045    |     |   |     |
|----|----------|-------------|-------|--------|-----|--------|-----|---|-----|------------|-----|---|-----|
|    |          |             |       | coding |     | coding |     |   |     | non-coding |     |   |     |
| PN | ENTAV115 | L, S        | L1+L2 | R      | 313 | R      | 180 | W | 411 | R          | 206 | Y | 252 |
|    |          | F, R        | L2    | R      | 313 | R      | 180 | W | 411 | R          | 206 | Y | 252 |
| PN | SMA185   | L, S        | L1+L2 | R      | 313 | R      | 180 | W | 411 | R          | 206 | Y | 252 |
|    |          | F, R        | L2    | R      | 313 | R      | 180 | W | 411 | R          | 206 | Y | 252 |
| PN | SMA191   | L, S        | L1+L2 | R      | 313 | R      | 180 | W | 411 | R          | 206 | Y | 252 |
|    |          | F, R        | L2    | R      | 313 | R      | 180 | W | 411 | R          | 206 | Y | 252 |
| PN | SMA201   | L, S        | L1+L2 | R      | 313 | R      | 180 | W | 411 | R          | 206 | Y | 252 |
|    |          | F, R        | L2    | R      | 313 | R      | 180 | W | 411 | R          | 206 | Y | 252 |
| PG | SMA505   | L, S        | L1+L2 | R      | 313 | R      | 180 | W | 411 | R          | 206 | Y | 252 |
|    |          | F, R        | L2    | A      | 313 | A      | 180 | A | 411 | G          | 206 | C | 252 |
| PG | SMA514   | L, S        | L1+L2 | R      | 313 | R      | 180 | W | 411 | R          | 206 | Y | 252 |
|    |          | F, R        | L2    | A      | 313 | A      | 180 | A | 411 | G          | 206 | C | 252 |
| PB | Lb16     | L, S        | L1+L2 | R      | 313 | R      | 180 | W | 411 | R          | 206 | Y | 252 |
|    |          | F, R        | L2    | R      | 313 | R      | 180 | W | 411 | R          | 206 | Y | 252 |
| PB | Lb18     | L, S        | L1+L2 | R      | 313 | R      | 180 | W | 411 | R          | 206 | Y | 252 |
|    |          | F, R        | L2    | R      | 313 | R      | 180 | W | 411 | R          | 206 | Y | 252 |
| PM | SMA814   | L, S        | L1+L2 | R      | 313 | R      | 180 | W | 411 | R          | 206 | Y | 252 |
|    |          | F, R        | L2    | R      | 313 | R      | 180 | W | 411 | R          | 206 | Y | 252 |
| PM | SMA829   | L, S        | L1+L2 | R      | 313 | R      | 180 | W | 411 | R          | 206 | Y | 252 |
|    |          | F, R        | L2    | R      | 313 | R      | 180 | W | 411 | R          | 206 | Y | 252 |

| Cv | Clone    | Tissue code | Layer | SNP4045    |     | VVNTM1         |     | VVNTM2         |     | VvMybA2  |    |   |    |
|----|----------|-------------|-------|------------|-----|----------------|-----|----------------|-----|----------|----|---|----|
|    |          |             |       | non-coding |     | microsatellite |     | microsatellite |     | promoter |    |   |    |
| PN | ENTAV115 | L, S        | L1+L2 | R          | 319 | 162            | 168 | 379            | 388 | R        | 77 | W | 97 |
|    |          | F, R        | L2    | R          | 319 | 162            | 168 | 379            | 388 | R        | 77 | W | 97 |
| PN | SMA185   | L, S        | L1+L2 | R          | 319 | 162            | 168 | 379            | 388 | R        | 77 | W | 97 |
|    |          | F, R        | L2    | R          | 319 | 162            | 168 | 379            | 388 | R        | 77 | W | 97 |
| PN | SMA191   | L, S        | L1+L2 | R          | 319 | 162            | 168 | 379            | 388 | R        | 77 | W | 97 |
|    |          | F, R        | L2    | R          | 319 | 162            | 168 | 379            | 388 | R        | 77 | W | 97 |
| PN | SMA201   | L, S        | L1+L2 | R          | 319 | 162            | 168 | 379            | 388 | R        | 77 | W | 97 |
|    |          | F, R        | L2    | R          | 319 | 162            | 168 | 379            | 388 | R        | 77 | W | 97 |
| PG | SMA505   | L, S        | L1+L2 | R          | 319 | 162            | 168 | 162            | 388 | R        | 77 | W | 97 |
|    |          | F, R        | L2    | A          | 319 | -              | 168 | -              | 388 | A        | 77 | A | 97 |
| PG | SMA514   | L, S        | L1+L2 | R          | 319 | 162            | 168 | 162            | 388 | R        | 77 | W | 97 |
|    |          | F, R        | L2    | A          | 319 | -              | 168 | -              | 388 | A        | 77 | A | 97 |
| PB | Lb16     | L, S        | L1+L2 | R          | 319 | -              | 168 | -              | 388 | A        | 77 | A | 97 |
|    |          | F, R        | L2    | R          | 319 | -              | 168 | -              | 388 | A        | 77 | A | 97 |
| PB | Lb18     | L, S        | L1+L2 | R          | 319 | -              | 168 | -              | 388 | A        | 77 | A | 97 |
|    |          | F, R        | L2    | R          | 319 | -              | 168 | -              | 388 | A        | 77 | A | 97 |
| PM | SMA814   | L, S        | L1+L2 | R          | 319 | 162            | 168 | 379            | 388 | R        | 77 | W | 97 |
|    |          | F, R        | L2    | R          | 319 | 162            | 168 | 379            | 388 | R        | 77 | W | 97 |
| PM | SMA829   | L, S        | L1+L2 | R          | 319 | 162            | 168 | 379            | 388 | R        | 77 | W | 97 |
|    |          | F, R        | L2    | R          | 319 | 162            | 168 | 379            | 388 | R        | 77 | W | 97 |

| Cv | Clone    | Tissue code | Layer | VvMybA2  |     |   |     |   |     |   |     |   |     |
|----|----------|-------------|-------|----------|-----|---|-----|---|-----|---|-----|---|-----|
|    |          |             |       | promoter |     |   |     |   |     |   |     |   |     |
| PN | ENTAV115 | L, S        | L1+L2 | S        | 100 | S | 103 | R | 112 | K | 131 | R | 144 |
|    |          | F, R        | L2    | S        | 100 | S | 103 | R | 112 | K | 131 | R | 144 |
| PN | SMA185   | L, S        | L1+L2 | S        | 100 | S | 103 | R | 112 | K | 131 | R | 144 |
|    |          | F, R        | L2    | S        | 100 | S | 103 | R | 112 | K | 131 | R | 144 |
| PN | SMA191   | L, S        | L1+L2 | S        | 100 | S | 103 | R | 112 | K | 131 | R | 144 |
|    |          | F, R        | L2    | S        | 100 | S | 103 | R | 112 | K | 131 | R | 144 |
| PN | SMA201   | L, S        | L1+L2 | S        | 100 | S | 103 | R | 112 | K | 131 | R | 144 |
|    |          | F, R        | L2    | S        | 100 | S | 103 | R | 112 | K | 131 | R | 144 |
| PG | SMA505   | L, S        | L1+L2 | S        | 100 | S | 103 | R | 112 | K | 131 | R | 144 |
|    |          | F, R        | L2    | C        | 100 | C | 103 | A | 112 | T | 131 | G | 144 |
| PG | SMA514   | L, S        | L1+L2 | S        | 100 | S | 103 | R | 112 | K | 131 | R | 144 |
|    |          | F, R        | L2    | C        | 100 | C | 103 | A | 112 | T | 131 | G | 144 |
| PB | Lb16     | L, S        | L1+L2 | C        | 100 | C | 103 | A | 112 | T | 131 | G | 144 |
|    |          | F, R        | L2    | C        | 100 | C | 103 | A | 112 | T | 131 | G | 144 |
| PB | Lb18     | L, S        | L1+L2 | C        | 100 | C | 103 | A | 112 | T | 131 | G | 144 |
|    |          | F, R        | L2    | C        | 100 | C | 103 | A | 112 | T | 131 | G | 144 |
| PM | SMA814   | L, S        | L1+L2 | S        | 100 | S | 103 | R | 112 | K | 131 | R | 144 |
|    |          | F, R        | L2    | S        | 100 | S | 103 | R | 112 | K | 131 | R | 144 |
| PM | SMA829   | L, S        | L1+L2 | S        | 100 | S | 103 | R | 112 | K | 131 | R | 144 |
|    |          | F, R        | L2    | S        | 100 | S | 103 | R | 112 | K | 131 | R | 144 |

| Cv | Clone    | Tissue code | Layer | VvMybA2  |     |   |     |   |     |   |     | VvMybA1  |          |
|----|----------|-------------|-------|----------|-----|---|-----|---|-----|---|-----|----------|----------|
|    |          |             |       | promoter |     |   |     |   |     |   |     | promoter |          |
| PN | ENTAV115 | L, S        | L1+L2 | W        | 384 | W | 408 | R | 431 | S | 456 | Gret     | non-Gret |
|    |          | F, R        | L2    | W        | 384 | W | 408 | R | 431 | S | 456 | Gret     | non-Gret |
| PN | SMA185   | L, S        | L1+L2 | W        | 384 | W | 408 | R | 431 | S | 456 | Gret     | non-Gret |
|    |          | F, R        | L2    | W        | 384 | W | 408 | R | 431 | S | 456 | Gret     | non-Gret |
| PN | SMA191   | L, S        | L1+L2 | W        | 384 | W | 408 | R | 431 | S | 456 | Gret     | non-Gret |
|    |          | F, R        | L2    | W        | 384 | W | 408 | R | 431 | S | 456 | Gret     | non-Gret |
| PN | SMA201   | L, S        | L1+L2 | W        | 384 | W | 408 | R | 431 | S | 456 | Gret     | non-Gret |
|    |          | F, R        | L2    | W        | 384 | W | 408 | R | 431 | S | 456 | Gret     | non-Gret |
| PG | SMA505   | L, S        | L1+L2 | W        | 384 | W | 408 | R | 431 | S | 456 | Gret     | non-Gret |
|    |          | F, R        | L2    | A        | 384 | T | 408 | G | 431 | C | 456 | Gret     | -        |
| PG | SMA514   | L, S        | L1+L2 | W        | 384 | W | 408 | R | 431 | S | 456 | Gret     | non-Gret |
|    |          | F, R        | L2    | A        | 384 | T | 408 | G | 431 | C | 456 | Gret     | -        |
| PB | Lb16     | L, S        | L1+L2 | A        | 384 | T | 408 | G | 431 | C | 456 | Gret     | -        |
|    |          | F, R        | L2    | A        | 384 | T | 408 | G | 431 | C | 456 | Gret     | -        |
| PB | Lb18     | L, S        | L1+L2 | A        | 384 | T | 408 | G | 431 | C | 456 | Gret     | -        |
|    |          | F, R        | L2    | A        | 384 | T | 408 | G | 431 | C | 456 | Gret     | -        |
| PM | SMA814   | L, S        | L1+L2 | W        | 384 | W | 408 | R | 431 | S | 456 | Gret     | non-Gret |
|    |          | F, R        | L2    | W        | 384 | W | 408 | R | 431 | S | 456 | Gret     | non-Gret |
| PM | SMA829   | L, S        | L1+L2 | W        | 384 | W | 408 | R | 431 | S | 456 | Gret     | non-Gret |
|    |          | F, R        | L2    | W        | 384 | W | 408 | R | 431 | S | 456 | Gret     | non-Gret |

| Cv | Clone    | Tissue code | Layer | VvMybA1 |     |   |     |   |     |   |     | VvMybA1 |     |
|----|----------|-------------|-------|---------|-----|---|-----|---|-----|---|-----|---------|-----|
|    |          |             |       | exon    |     |   |     |   |     |   |     | 3'UTR   |     |
| PN | ENTAV115 | L, S        | L1+L2 | K       | 161 | K | 176 | S | 187 | M | 235 | Y       | 481 |
|    |          | F, R        | L2    | K       | 161 | K | 176 | S | 187 | M | 235 | Y       | 481 |
| PN | SMA185   | L, S        | L1+L2 | K       | 161 | K | 176 | S | 187 | M | 235 | Y       | 481 |
|    |          | F, R        | L2    | K       | 161 | K | 176 | S | 187 | M | 235 | Y       | 481 |
| PN | SMA191   | L, S        | L1+L2 | K       | 161 | K | 176 | S | 187 | M | 235 | Y       | 481 |
|    |          | F, R        | L2    | K       | 161 | K | 176 | S | 187 | M | 235 | Y       | 481 |
| PN | SMA201   | L, S        | L1+L2 | K       | 161 | K | 176 | S | 187 | M | 235 | Y       | 481 |
|    |          | F, R        | L2    | K       | 161 | K | 176 | S | 187 | M | 235 | Y       | 481 |
| PG | SMA505   | L, S        | L1+L2 | K       | 161 | K | 176 | S | 187 | M | 235 | Y       | 481 |
|    |          | F, R        | L2    | G       | 161 | T | 176 | C | 187 | A | 235 | T       | 481 |
| PG | SMA514   | L, S        | L1+L2 | K       | 161 | K | 176 | S | 187 | M | 235 | Y       | 481 |
|    |          | F, R        | L2    | G       | 161 | T | 176 | C | 187 | A | 235 | T       | 481 |
| PB | Lb16     | L, S        | L1+L2 | G       | 161 | T | 176 | C | 187 | A | 235 | T       | 481 |
|    |          | F, R        | L2    | G       | 161 | T | 176 | C | 187 | A | 235 | T       | 481 |
| PB | Lb18     | L, S        | L1+L2 | G       | 161 | T | 176 | C | 187 | A | 235 | T       | 481 |
|    |          | F, R        | L2    | G       | 161 | T | 176 | C | 187 | A | 235 | T       | 481 |
| PM | SMA814   | L, S        | L1+L2 | K       | 161 | K | 176 | S | 187 | M | 235 | Y       | 481 |
|    |          | F, R        | L2    | K       | 161 | K | 176 | S | 187 | M | 235 | Y       | 481 |
| PM | SMA829   | L, S        | L1+L2 | K       | 161 | K | 176 | S | 187 | M | 235 | Y       | 481 |
|    |          | F, R        | L2    | K       | 161 | K | 176 | S | 187 | M | 235 | Y       | 481 |

| Cv | Clone    | Tissue code | Layer | VvMybA1 |     | VVNTM3         |     | SNP7234    |     | VVNTM5         |     | SNP7253    |    |
|----|----------|-------------|-------|---------|-----|----------------|-----|------------|-----|----------------|-----|------------|----|
|    |          |             |       | 3'UTR   |     | microsatellite |     | non-coding |     | microsatellite |     | non-coding |    |
| PN | ENTAV115 | L, S        | L1+L2 | K       | 571 | 272            | 296 | R          | 103 | 288            | 300 | M          | 74 |
|    |          | F, R        | L2    | K       | 571 | 272            | 296 | R          | 103 | 288            | 300 | M          | 74 |
| PN | SMA185   | L, S        | L1+L2 | K       | 571 | 272            | 296 | R          | 103 | 288            | 300 | M          | 74 |
|    |          | F, R        | L2    | K       | 571 | 272            | 296 | R          | 103 | 288            | 300 | M          | 74 |
| PN | SMA191   | L, S        | L1+L2 | K       | 571 | 272            | 296 | R          | 103 | 288            | 300 | M          | 74 |
|    |          | F, R        | L2    | K       | 571 | 272            | 296 | R          | 103 | 288            | 300 | M          | 74 |
| PN | SMA201   | L, S        | L1+L2 | K       | 571 | 272            | 296 | R          | 103 | 288            | 300 | M          | 74 |
|    |          | F, R        | L2    | K       | 571 | 272            | 296 | R          | 103 | 288            | 300 | M          | 74 |
| PG | SMA505   | L, S        | L1+L2 | K       | 571 | 272            | 296 | R          | 103 | 288            | 300 | M          | 74 |
|    |          | F, R        | L2    | G       | 571 | 272            | -   | G          | 103 | 288            | -   | C          | 74 |
| PG | SMA514   | L, S        | L1+L2 | K       | 571 | 272            | 296 | R          | 103 | 288            | 300 | M          | 74 |
|    |          | F, R        | L2    | G       | 571 | 272            | -   | G          | 103 | 288            | -   | C          | 74 |
| PB | Lb16     | L, S        | L1+L2 | G       | 571 | 272            | 296 | R          | 103 | 288            | 300 | M          | 74 |
|    |          | F, R        | L2    | G       | 571 | 272            | 296 | R          | 103 | 288            | 300 | M          | 74 |
| PB | Lb18     | L, S        | L1+L2 | G       | 571 | 272            | 296 | R          | 103 | 288            | 300 | M          | 74 |
|    |          | F, R        | L2    | G       | 571 | 272            | 296 | R          | 103 | 288            | 300 | M          | 74 |
| PM | SMA814   | L, S        | L1+L2 | K       | 571 | 272            | 296 | R          | 103 | 288            | 300 | M          | 74 |
|    |          | F, R        | L2    | K       | 571 | 272            | 296 | R          | 103 | 288            | 300 | M          | 74 |
| PM | SMA829   | L, S        | L1+L2 | K       | 571 | 272            | 296 | R          | 103 | 288            | 300 | M          | 74 |
|    |          | F, R        | L2    | K       | 571 | 272            | 296 | R          | 103 | 288            | 300 | M          | 74 |

| Cv | Clone    | Tissue code | Layer | SNP7253    |     |   |     |   |     | SNP0060    |     |   |     |
|----|----------|-------------|-------|------------|-----|---|-----|---|-----|------------|-----|---|-----|
|    |          |             |       | non-coding |     |   |     |   |     | non-coding |     |   |     |
| PN | ENTAV115 | L, S        | L1+L2 | Y          | 159 | R | 194 | K | 264 | Y          | 243 | R | 244 |
|    |          | F, R        | L2    | Y          | 159 | R | 194 | K | 264 | Y          | 243 | R | 244 |
| PN | SMA185   | L, S        | L1+L2 | Y          | 159 | R | 194 | K | 264 | Y          | 243 | R | 244 |
|    |          | F, R        | L2    | Y          | 159 | R | 194 | K | 264 | Y          | 243 | R | 244 |
| PN | SMA191   | L, S        | L1+L2 | Y          | 159 | R | 194 | K | 264 | Y          | 243 | R | 244 |
|    |          | F, R        | L2    | Y          | 159 | R | 194 | K | 264 | Y          | 243 | R | 244 |
| PN | SMA201   | L, S        | L1+L2 | Y          | 159 | R | 194 | K | 264 | Y          | 243 | R | 244 |
|    |          | F, R        | L2    | Y          | 159 | R | 194 | K | 264 | Y          | 243 | R | 244 |
| PG | SMA505   | L, S        | L1+L2 | Y          | 159 | R | 194 | K | 264 | Y          | 243 | R | 244 |
|    |          | F, R        | L2    | C          | 159 | G | 194 | T | 264 | C          | 243 | A | 244 |
| PG | SMA514   | L, S        | L1+L2 | Y          | 159 | R | 194 | K | 264 | Y          | 243 | R | 244 |
|    |          | F, R        | L2    | C          | 159 | G | 194 | T | 264 | C          | 243 | A | 244 |
| PB | Lb16     | L, S        | L1+L2 | Y          | 159 | R | 194 | K | 264 | Y          | 243 | R | 244 |
|    |          | F, R        | L2    | Y          | 159 | R | 194 | K | 264 | Y          | 243 | R | 244 |
| PB | Lb18     | L, S        | L1+L2 | Y          | 159 | R | 194 | K | 264 | Y          | 243 | R | 244 |
|    |          | F, R        | L2    | Y          | 159 | R | 194 | K | 264 | Y          | 243 | R | 244 |
| PM | SMA814   | L, S        | L1+L2 | Y          | 159 | R | 194 | K | 264 | Y          | 243 | R | 244 |
|    |          | F, R        | L2    | Y          | 159 | R | 194 | K | 264 | Y          | 243 | R | 244 |
| PM | SMA829   | L, S        | L1+L2 | Y          | 159 | R | 194 | K | 264 | Y          | 243 | R | 244 |
|    |          | F, R        | L2    | Y          | 159 | R | 194 | K | 264 | Y          | 243 | R | 244 |

| Cv | Clone    | Tissue code | Layer | SNP8066    |   | SNP4071    |     | SNP7054    |    |   |     |   |     |
|----|----------|-------------|-------|------------|---|------------|-----|------------|----|---|-----|---|-----|
|    |          |             |       | non-coding |   | non-coding |     | non-coding |    |   |     |   |     |
| PN | ENTAV115 | L, S        | L1+L2 | S          | 4 | <b>R</b>   | 113 | K          | 82 | R | 102 | Y | 116 |
|    |          | F, R        | L2    | S          | 4 | <b>R</b>   | 113 | K          | 82 | R | 102 | Y | 116 |
| PN | SMA185   | L, S        | L1+L2 | S          | 4 | <b>R</b>   | 113 | K          | 82 | R | 102 | Y | 116 |
|    |          | F, R        | L2    | S          | 4 | <b>R</b>   | 113 | K          | 82 | R | 102 | Y | 116 |
| PN | SMA191   | L, S        | L1+L2 | S          | 4 | <b>R</b>   | 113 | K          | 82 | R | 102 | Y | 116 |
|    |          | F, R        | L2    | S          | 4 | <b>R</b>   | 113 | K          | 82 | R | 102 | Y | 116 |
| PN | SMA201   | L, S        | L1+L2 | S          | 4 | <b>R</b>   | 113 | K          | 82 | R | 102 | Y | 116 |
|    |          | F, R        | L2    | S          | 4 | <b>R</b>   | 113 | K          | 82 | R | 102 | Y | 116 |
| PG | SMA505   | L, S        | L1+L2 | S          | 4 | <b>R</b>   | 113 | K          | 82 | R | 102 | Y | 116 |
|    |          | F, R        | L2    | G          | 4 | A          | 113 | G          | 82 | G | 102 | C | 116 |
| PG | SMA514   | L, S        | L1+L2 | S          | 4 | <b>R</b>   | 113 | K          | 82 | R | 102 | Y | 116 |
|    |          | F, R        | L2    | G          | 4 | A          | 113 | G          | 82 | G | 102 | C | 116 |
| PB | Lb16     | L, S        | L1+L2 | S          | 4 | <b>R</b>   | 113 | K          | 82 | R | 102 | Y | 116 |
|    |          | F, R        | L2    | S          | 4 | <b>R</b>   | 113 | K          | 82 | R | 102 | Y | 116 |
| PB | Lb18     | L, S        | L1+L2 | S          | 4 | <b>R</b>   | 113 | K          | 82 | R | 102 | Y | 116 |
|    |          | F, R        | L2    | S          | 4 | <b>R</b>   | 113 | K          | 82 | R | 102 | Y | 116 |
| PM | SMA814   | L, S        | L1+L2 | S          | 4 | <b>R</b>   | 113 | K          | 82 | R | 102 | Y | 116 |
|    |          | F, R        | L2    | S          | 4 | <b>R</b>   | 113 | K          | 82 | R | 102 | Y | 116 |
| PM | SMA829   | L, S        | L1+L2 | S          | 4 | <b>R</b>   | 113 | K          | 82 | R | 102 | Y | 116 |
|    |          | F, R        | L2    | S          | 4 | <b>R</b>   | 113 | K          | 82 | R | 102 | Y | 116 |



| Cv | Clone    | Tissue code | Layer | SNP7054    |     |   |     |   |     |   |     |   |     |
|----|----------|-------------|-------|------------|-----|---|-----|---|-----|---|-----|---|-----|
|    |          |             |       | non-coding |     |   |     |   |     |   |     |   |     |
| PN | ENTAV115 | L, S        | L1+L2 | M          | 139 | W | 143 | W | 164 | Y | 284 | Y | 325 |
|    |          | F, R        | L2    | M          | 139 | W | 143 | W | 164 | Y | 284 | Y | 325 |
| PN | SMA185   | L, S        | L1+L2 | M          | 139 | W | 143 | W | 164 | Y | 284 | Y | 325 |
|    |          | F, R        | L2    | M          | 139 | W | 143 | W | 164 | Y | 284 | Y | 325 |
| PN | SMA191   | L, S        | L1+L2 | M          | 139 | W | 143 | W | 164 | Y | 284 | Y | 325 |
|    |          | F, R        | L2    | M          | 139 | W | 143 | W | 164 | Y | 284 | Y | 325 |
| PN | SMA201   | L, S        | L1+L2 | M          | 139 | W | 143 | W | 164 | Y | 284 | Y | 325 |
|    |          | F, R        | L2    | M          | 139 | W | 143 | W | 164 | Y | 284 | Y | 325 |
| PG | SMA505   | L, S        | L1+L2 | M          | 139 | W | 143 | W | 164 | Y | 284 | Y | 325 |
|    |          | F, R        | L2    | A          | 139 | A | 143 | T | 164 | T | 284 | T | 325 |
| PG | SMA514   | L, S        | L1+L2 | M          | 139 | W | 143 | W | 164 | Y | 284 | Y | 325 |
|    |          | F, R        | L2    | A          | 139 | A | 143 | T | 164 | T | 284 | T | 325 |
| PB | Lb16     | L, S        | L1+L2 | M          | 139 | W | 143 | W | 164 | Y | 284 | Y | 325 |
|    |          | F, R        | L2    | M          | 139 | W | 143 | W | 164 | Y | 284 | Y | 325 |
| PB | Lb18     | L, S        | L1+L2 | M          | 139 | W | 143 | W | 164 | Y | 284 | Y | 325 |
|    |          | F, R        | L2    | M          | 139 | W | 143 | W | 164 | Y | 284 | Y | 325 |
| PM | SMA814   | L, S        | L1+L2 | M          | 139 | W | 143 | W | 164 | Y | 284 | Y | 325 |
|    |          | F, R        | L2    | M          | 139 | W | 143 | W | 164 | Y | 284 | Y | 325 |
| PM | SMA829   | L, S        | L1+L2 | M          | 139 | W | 143 | W | 164 | Y | 284 | Y | 325 |
|    |          | F, R        | L2    | M          | 139 | W | 143 | W | 164 | Y | 284 | Y | 325 |

| Cv | Clone    | Tissue code | Layer | SNP7054    |     |   |     |   |     | VVIU20         |     | SNP7002    |     |
|----|----------|-------------|-------|------------|-----|---|-----|---|-----|----------------|-----|------------|-----|
|    |          |             |       | non-coding |     |   |     |   |     | microsatellite |     | non-coding |     |
| PN | ENTAV115 | L, S        | L1+L2 | Y          | 366 | R | 387 | Y | 419 | 361            | 383 | R          | 144 |
|    |          | F, R        | L2    | Y          | 366 | R | 387 | Y | 419 | 361            | 383 | R          | 144 |
| PN | SMA185   | L, S        | L1+L2 | Y          | 366 | R | 387 | Y | 419 | 361            | 383 | R          | 144 |
|    |          | F, R        | L2    | Y          | 366 | R | 387 | Y | 419 | 361            | 383 | R          | 144 |
| PN | SMA191   | L, S        | L1+L2 | Y          | 366 | R | 387 | Y | 419 | 361            | 383 | R          | 144 |
|    |          | F, R        | L2    | Y          | 366 | R | 387 | Y | 419 | 361            | 383 | R          | 144 |
| PN | SMA201   | L, S        | L1+L2 | Y          | 366 | R | 387 | Y | 419 | 361            | 383 | R          | 144 |
|    |          | F, R        | L2    | Y          | 366 | R | 387 | Y | 419 | 361            | 383 | R          | 144 |
| PG | SMA505   | L, S        | L1+L2 | Y          | 366 | R | 387 | Y | 419 | 361            | 383 | R          | 144 |
|    |          | F, R        | L2    | C          | 366 | A | 387 | T | 419 | 361            | -   | G          | 144 |
| PG | SMA514   | L, S        | L1+L2 | Y          | 366 | R | 387 | Y | 419 | 361            | 383 | R          | 144 |
|    |          | F, R        | L2    | C          | 366 | A | 387 | T | 419 | 361            | -   | G          | 144 |
| PB | Lb16     | L, S        | L1+L2 | Y          | 366 | R | 387 | Y | 419 | 361            | 383 | R          | 144 |
|    |          | F, R        | L2    | Y          | 366 | R | 387 | Y | 419 | 361            | 383 | R          | 144 |
| PB | Lb18     | L, S        | L1+L2 | Y          | 366 | R | 387 | Y | 419 | 361            | 383 | R          | 144 |
|    |          | F, R        | L2    | Y          | 366 | R | 387 | Y | 419 | 361            | 383 | R          | 144 |
| PM | SMA814   | L, S        | L1+L2 | Y          | 366 | R | 387 | Y | 419 | 361            | 383 | R          | 144 |
|    |          | F, R        | L2    | Y          | 366 | R | 387 | Y | 419 | 361            | 383 | R          | 144 |
| PM | SMA829   | L, S        | L1+L2 | Y          | 366 | R | 387 | Y | 419 | 361            | 383 | R          | 144 |
|    |          | F, R        | L2    | Y          | 366 | R | 387 | Y | 419 | 361            | 383 | R          | 144 |

| Cv | Clone    | Tissue code | Layer | SNP6166    |     |   |     |   |     |          |     | VMC7G3         |     |
|----|----------|-------------|-------|------------|-----|---|-----|---|-----|----------|-----|----------------|-----|
|    |          |             |       | non-coding |     |   |     |   |     |          |     | microsatellite |     |
| PN | ENTAV115 | L, S        | L1+L2 | Y          | 144 | Y | 187 | M | 202 | <b>K</b> | 302 | 115            | 131 |
|    |          | F, R        | L2    | Y          | 144 | Y | 187 | M | 202 | <b>K</b> | 302 | 115            | 131 |
| PN | SMA185   | L, S        | L1+L2 | Y          | 144 | Y | 187 | M | 202 | <b>K</b> | 302 | 115            | 131 |
|    |          | F, R        | L2    | Y          | 144 | Y | 187 | M | 202 | <b>K</b> | 302 | 115            | 131 |
| PN | SMA191   | L, S        | L1+L2 | Y          | 144 | Y | 187 | M | 202 | <b>K</b> | 302 | 115            | 131 |
|    |          | F, R        | L2    | Y          | 144 | Y | 187 | M | 202 | <b>K</b> | 302 | 115            | 131 |
| PN | SMA201   | L, S        | L1+L2 | Y          | 144 | Y | 187 | M | 202 | <b>K</b> | 302 | 115            | 131 |
|    |          | F, R        | L2    | Y          | 144 | Y | 187 | M | 202 | <b>K</b> | 302 | 115            | 131 |
| PG | SMA505   | L, S        | L1+L2 | Y          | 144 | Y | 187 | M | 202 | <b>K</b> | 302 | 115            | 131 |
|    |          | F, R        | L2    | T          | 144 | C | 187 | A | 202 | T        | 302 | 115            | -   |
| PG | SMA514   | L, S        | L1+L2 | Y          | 144 | Y | 187 | M | 202 | <b>K</b> | 302 | 115            | 131 |
|    |          | F, R        | L2    | T          | 144 | C | 187 | A | 202 | T        | 302 | 115            | -   |
| PB | Lb16     | L, S        | L1+L2 | Y          | 144 | Y | 187 | M | 202 | <b>K</b> | 302 | 115            | 131 |
|    |          | F, R        | L2    | Y          | 144 | Y | 187 | M | 202 | <b>K</b> | 302 | 115            | 131 |
| PB | Lb18     | L, S        | L1+L2 | Y          | 144 | Y | 187 | M | 202 | <b>K</b> | 302 | 115            | 131 |
|    |          | F, R        | L2    | Y          | 144 | Y | 187 | M | 202 | <b>K</b> | 302 | 115            | 131 |
| PM | SMA814   | L, S        | L1+L2 | Y          | 144 | Y | 187 | M | 202 | <b>K</b> | 302 | 115            | 131 |
|    |          | F, R        | L2    | Y          | 144 | Y | 187 | M | 202 | <b>K</b> | 302 | 115            | 131 |
| PM | SMA829   | L, S        | L1+L2 | Y          | 144 | Y | 187 | M | 202 | <b>K</b> | 302 | 115            | 131 |
|    |          | F, R        | L2    | Y          | 144 | Y | 187 | M | 202 | <b>K</b> | 302 | 115            | 131 |

**Table S5**

Genetic make-up of the Pinots core set at the berry color locus.

| Locus                 | Type           | 12X start  | Chr | State of PN and PM L1+L2 | State of PB L1+L2 | State of L1 PG  | State of L2 PG  |
|-----------------------|----------------|------------|-----|--------------------------|-------------------|-----------------|-----------------|
| Chr2_start            |                | 0          | 2   |                          |                   |                 |                 |
| SNP6139               | non-coding     | 781.621    | 2   | heterozygous             | heterozygous      | heterozygous    | heterozygous    |
| SNP4165               | non-coding     | 5.873.288  | 2   | heterozygous             | heterozygous      | heterozygous    | heterozygous    |
| VMC6B11               | microsatellite | 8.128.443  | 2   | heterozygous             | heterozygous      | heterozygous    | heterozygous    |
| SNP6003               | non-coding     | 8.310.926  | 2   | heterozygous             | heterozygous      | heterozygous    | heterozygous    |
| SNP6097               | non-coding     | 9.987.080  | 2   | heterozygous             | heterozygous      | heterozygous    | heterozygous    |
| SC8_0146_010          | microsatellite | 12.674.498 | 2   | heterozygous             | heterozygous      | heterozygous    | heterozygous    |
| SC8_0146_026          | microsatellite | 12.969.988 | 2   | not polymorphic          | not polymorphic   | not polymorphic | not polymorphic |
| SV02                  | gene           | 13.004.264 | 2   | heterozygous             | heterozygous      | heterozygous    | heterozygous    |
| SV06                  | gene           | 13.419.774 | 2   | heterozygous             | heterozygous      | heterozygous    | heterozygous    |
| SV08                  | gene           | 13.761.815 | 2   | not polymorphic          | not polymorphic   | not polymorphic | not polymorphic |
| SV09                  | gene           | 13.772.327 | 2   | heterozygous             | heterozygous      | heterozygous    | heterozygous    |
| SV10                  | gene           | 13.919.740 | 2   | heterozygous             | heterozygous      | heterozygous    | homozygous-like |
| SV12                  | gene           | 14.027.837 | 2   | heterozygous             | heterozygous      | heterozygous    | homozygous-like |
| SNP4045               | non-coding     | 14.068.644 | 2   | heterozygous             | heterozygous      | heterozygous    | homozygous-like |
| VVNTM1                | microsatellite | 14.149.213 | 2   | heterozygous             | homozygous-like   | heterozygous    | homozygous-like |
| VVNTM2                | microsatellite | 14.150.879 | 2   | heterozygous             | homozygous-like   | heterozygous    | homozygous-like |
| Myb A4 cds            | gene           | 14.162.753 | 2   | not polymorphic          | not polymorphic   | not polymorphic | not polymorphic |
| Myb A2 3'UTR          | gene           | 14.179.489 | 2   | not polymorphic          | not polymorphic   | not polymorphic | not polymorphic |
| Myb A2 pro-cds        | gene           | 14.180.663 | 2   | heterozygous             | homozygous-like   | heterozygous    | homozygous-like |
| Myb A1 3'UTR          | gene           | 14.239.727 | 2   | heterozygous             | homozygous-like   | heterozygous    | homozygous-like |
| Gret - Myb A1 pro-cds | gene           | 14.249.728 | 2   | present                  | absent            | present         | absent          |
| Gret + Myb A1 pro-cds | gene           | 14.249.728 | 2   | present                  | present           | present         | present         |
| VVNTM3                | microsatellite | 14.287.961 | 2   | heterozygous             | heterozygous      | heterozygous    | homozygous-like |
| SNP7234               | non-coding     | 14.292.277 | 2   | heterozygous             | heterozygous      | heterozygous    | homozygous-like |
| VVNTM5                | microsatellite | 14.325.347 | 2   | heterozygous             | heterozygous      | heterozygous    | homozygous-like |
| VVNTM6                | microsatellite | 14.330.246 | 2   | not polymorphic          | not polymorphic   | not polymorphic | not polymorphic |
| VVNTM4                | microsatellite | 14.384.009 | 2   | not polymorphic          | not polymorphic   | not polymorphic | not polymorphic |
| SNP7253               | non-coding     | 14.567.410 | 2   | heterozygous             | heterozygous      | heterozygous    | homozygous-like |

|          |                |            |   |              |              |              |                 |
|----------|----------------|------------|---|--------------|--------------|--------------|-----------------|
| SNP0060  | non-coding     | 14.854.622 | 2 | heterozygous | heterozygous | heterozygous | homozygous-like |
| SNP8066  | non-coding     | 15.169.091 | 2 | heterozygous | heterozygous | heterozygous | homozygous-like |
| SNP4071  | non-coding     | 15.776.237 | 2 | heterozygous | heterozygous | heterozygous | homozygous-like |
| SNP7054  | non-coding     | 16.287.292 | 2 | heterozygous | heterozygous | heterozygous | homozygous-like |
| VVIU20   | microsatellite | 16.538.777 | 2 | heterozygous | heterozygous | heterozygous | homozygous-like |
| SNP7002  | non-coding     | 16.653.403 | 2 | heterozygous | heterozygous | heterozygous | homozygous-like |
| SNP6166  | non-coding     | 17.097.606 | 2 | heterozygous | heterozygous | heterozygous | homozygous-like |
| VMC7G3   | microsatellite | 18.270.821 | 2 | heterozygous | heterozygous | heterozygous | homozygous-like |
| Chr2_end |                | 18.779.844 | 2 |              |              |              |                 |

**Table S6**

Genotypic state of the Pinots core set at all the analyzed loci along the chromosome 2.
